# Supplementary material
Source: publisher site journal article supplement (https://www.dovepress.com/article/478511)
Supplement: Supplementary file 1 [file get_supplementary_file.php]

Supplementary file 1:

**Eritrean Pharmaceutical Association (ERIPA)**

Disposal Practices of Unused and Expired Pharmaceuticals among Households in Asmara: A Cross-sectional Descriptive Study

| **PART 1: Identification** | | | |
| --- | --- | --- | --- |
| Sub-Zone  Kebabi Administration  Participant’s Identification Number (*Start with 001 in every Kebabi Administration*) | | |  |
| Interview date_________/________/2023 | | | |
| Questionnaire status 1= Completed 2= Incomplete 3= Other (mention) | | | |
| Name and code of interviewer  ____________________ | Name and code of supervisor  ______________________ | Code of data entry personnel | |

*I declare, with my signature, that I have fully understood the objectives of the study and that my participation is voluntary: _____*

| **PART II: Sociodemographic and General Information** | | | |
| --- | --- | --- | --- |
| **No.** | **Indicators** | **Coding categories** | **Skip** |
|  | Age (in completed years) |  |  |
|  | Sex | Male1  Female2 |  |
|  | Ethnicity | Tigrigna 1  Tigre2  Saho3  Bilen4  Afar5  Nara6  Kunama7  Bidhawyet8  Rashaida9  Other *(please specify)* 10 |  |
|  | Religion | Christian1  Muslim2  Other *(please specify)*3 |  |
|  | Highest level of education |  |  |
|  | Occupation | Employed1  Unemployed2 |  |
|  | Do you have family member(s) with chronic illness? | Yes1  No 2 | **209** |
|  | How many family members have chronic illness? |  |  |
|  | Type of chronic illness (*consider all members of the family*) | HypertensionA  DM B  Asthma C  ArthritisD  Hypercholesterolemia E  HeadacheF  Other (please specify) X |  |
|  | Household size (over the past one year) |  |  |

| **PART III: Knowledge on Disposal of Household Unused/Expired Medications** | | | | | | |
| --- | --- | --- | --- | --- | --- | --- |
| **No.** | **Questions** | **Coding categories** | | | | **Skip** |
|  | Is there difference between disposal of municipality and pharmaceutical wastes? | Yes1  No2  Do not know3 | | | |  |
|  | How should household unused/expired medicines be disposed?  *(Ask for each choice and tick in each box)* | Questions | Yes (1) | No (2) | DK (3) |  |
| 1. Throwing in garbage |  |  |  |
| 1. Flushing down the sink/toilet |  |  |  |
| 1. Returning back to health facilities |  |  |  |
| 1. Burning in open air |  |  |  |
| 1. Dumping under soil |  |  |  |
|  | What do you think are the impacts of presence of pharmaceutical residues in the environment?  *(Ask for each choice and tick in each box)* | Questions | Yes (1) | No (2) | DK (3) |  |
| 1. Water bodies and drinking   water contamination |  |  |  |
| 1. Soil fertility increment |  |  |  |
| 1. Accidental human and animal poisoning |  |  |  |
| 1. Water bodies and drinking water cleansing |  |  |  |
| 1. Environmental pollution (air, soil) |  |  |  |
| 1. Antibiotic resistance |  |  |  |

| **PART IV: Disposal Practice of Household Unused/Expired Medications** | | | |
| --- | --- | --- | --- |
| **No.** | **Questions** | **Coding categories** | **Skip** |
|  | Have you (including the family’s practice) had unused/leftover/expired medicines over the past one year? | Yes1  No2  Don’t remember3 | **501** |
|  | Why did you (including the family’s reasons) keep these medicines?  *(Multiple answers are possible. Probe when necessary)* | Medical condition improvedA  Adverse drug reaction(s) encounteredB  Therapeutic effectiveness unseenC  Dosage/regimen changedD  Medicine over prescribedE  Consumer deceased F  Consumer left it G  Not knowing where to dispose ofH  For future use *(unused drugs)* I  Had plans of using it *(expired drugs)* J  Other *(please specify)* X |  |
|  | What have you done with the unused/leftover/expired medicines?  *(Multiple answers are possible. Probe when necessary)* | Threw away with household garbageA  Flushed down the toilet/sinkB  Kept for future useC  Burnt in open airD  Dumped under soilE  Gave to family or friendsF  Returned back to health facility/pharmacyG  I have not disposed over the past one year H  Other *(please specify)* X |  |
|  | Do you (including the families) have any unused and/or expired pharmaceuticals now? | Yes1  No 2 | **501** |

|  | Provide list of the currently available medicines in the table |  |
| --- | --- | --- |
|  | |  | 405. Product name | 406.Therapeutic category | 407.Unit | 408.  Qty  (each) | 409.  Expired  1= Yes  2= No  3= UK | 410. Reason for not discarding:   1. Not knowing where to dispose of 2. For future use 3. Had plans of using it 4. Had no time to dispose 5. Forgot to dispose 6. Why rush 7. Other (please specify) ____ | | --- | --- | --- | --- | --- | --- | --- | | 1. 1 |  |  |  |  |  |  | | 1. 2 |  |  |  |  |  |  | | 1. 3 |  |  |  |  |  |  | | 1. 4 |  |  |  |  |  |  | | 1. 5 |  |  |  |  |  |  | | 1. 6 |  |  |  |  |  |  | | 1. 7 |  |  |  |  |  |  | | 1. 8 |  |  |  |  |  |  | | 1. 9 |  |  |  |  |  |  | | 1. 10 |  |  |  |  |  |  | | 11 |  |  |  |  |  |  | | 12 |  |  |  |  |  |  | | 13 |  |  |  |  |  |  | | 14 |  |  |  |  |  |  | | 15 |  |  |  |  |  |  | | 16 |  |  |  |  |  |  | | 17 |  |  |  |  |  |  | | 18 |  |  |  |  |  |  | | 19 |  |  |  |  |  |  | | 20 |  |  |  |  |  |  | |  |

| **PART V: Household Willingness to Participate in Medicine Take-Back System** | | | | | | |
| --- | --- | --- | --- | --- | --- | --- |
| *I am going to read you a series of statements. Assuming there is a medicines take-back system, kindly indicate your level of agreement.* | | | | | | |
|  | Statement | Strongly agree  (1) | Agree  (2) | Neutral  (3) | Disagree  (4) | Strongly Disagree  (5) |
|  | I would return unused/expired medicines back to community pharmacy/ health facility. |  |  |  |  |  |
|  | I would recommend others to return unused/expired medicines back to community pharmacy/ health facility. |  |  |  |  |  |
|  | I intend to continue using the same disposal method than participating in the new medicines take-back system |  |  |  |  |  |
|  | I can easily return back unused/expired medicines to nearby pharmacies/health facilities. |  |  |  |  |  |
|  | What challenges would you anticipate in implementing a household medicines take-back project? | 1. ________________________________________________ 2. ________________________________________________ 3. ________________________________________________ 4. ________________________________________________ 5. ________________________________________________ | | | | |

Thank You!

Supplementary file 2: Proportion of medicines found in households of Asmara during the study period

| Medicines | n | % |
| --- | --- | --- |
| Paracetamol | 166 | 25.9 |
| Ibuprofen | 97 | 15.1 |
| Amoxicillin | 31 | 5.1 |
| Diclofenac | 31 | 5.0 |
| Aluminum hydroxide + Magnesium hydroxide | 18 | 2.9 |
| Omeprazole | 18 | 2.7 |
| Chlorphenamine maleate | 15 | 2.2 |
| ORS | 15 | 2.4 |
| Aspirin | 14 | 1.9 |
| Loperamide | 13 | 1.9 |
| Rhinostop | 13 | 2.0 |
| Multivitamin | 13 | 2.1 |
| Hyoscine | 11 | 1.7 |
| Ciprofloxacin | 8 | 1.4 |
| Co-trimoxazole | 7 | 1.2 |
| Prednisolone | 7 | 1.0 |
| Indomethacin | 7 | 0.9 |
| Zinc | 7 | 1.3 |
| Salbutamol | 6 | 0.8 |
| Vitamin C | 6 | 0.9 |
| Unknown | 6 | 0.9 |
| B-complex | 5 | 0.7 |
| Doxycycline | 5 | 0.7 |
| Metronidazole | 5 | 0.8 |
| Antihaemorrhoid | 4 | 0.6 |
| Augmentin | 3 | 0.4 |
| Dextromethorphan | 3 | 0.5 |
| Iron | 3 | 0.4 |
| TTC eye ointment | 3 | 0.4 |
| Vitamin D3+calcium | 3 | 0.5 |
| Metoclopramide | 2 | 0.3 |
| Amoxicillin flucloxacillin | 2 | 0.3 |
| ASA+PARA+caffeine | 2 | 0.3 |
| Betamethasone | 2 | 0.4 |
| Calcium carbonate | 2 | 0.4 |
| Clarithromycin | 2 | 0.2 |
| Clotrimazole | 2 | 0.3 |
| Cod liver oil | 2 | 0.4 |
| Compounded cream | 2 | 0.4 |
| Enalapril | 2 | 0.4 |
| Famotidine | 2 | 0.2 |
| Flucap (CPM+caffeine+paracetamol+pseudoephedrin) | 2 | 0.3 |
| Fluocinonide | 2 | 0.3 |
| HCT | 2 | 0.3 |
| Iron + Folic acid | 2 | 0.3 |
| Methyl salicylate | 2 | 0.3 |
| Miconazole cream | 2 | 0.2 |
| Naproxen | 2 | 0.4 |
| Omega-3-fatty acid | 2 | 0.3 |
| Ondansetron | 2 | 0.4 |
| Phenobarbitone | 2 | 0.3 |
| Psyllium fiber | 2 | 0.4 |
| Whitefield | 2 | 0.2 |
| Xylometazoline | 2 | 0.3 |
| Glycerol | 2 | 0.4 |
| Acetaminophen+dextromethorphan+Guaifenesin+phenylephrine | 1 | 0.2 |
| Acyclovir | 1 | 0.2 |
| Amitriptyline | 1 | 0.2 |
| Ampicillin | 1 | 0.3 |
| Artificial tear | 1 | 0.2 |
| Atovaquone/proguanil | 1 | 0.2 |
| Benzydamine HCL | 1 | 0.2 |
| Bismuth subsalicylate | 1 | 0.2 |
| CAF eye drop | 1 | 0.1 |
| Carvedilol | 1 | 0.1 |
| Cetirizine | 1 | 0.1 |
| Chlorpheniramine + Paracetamol + Phenylephrine | 1 | 0.1 |
| Ciprofloxacin + Dexamethasone | 1 | 0.1 |
| Clove oil | 1 | 0.2 |
| Cloxacillin | 1 | 0.2 |
| Codeine phosphate | 1 | 0.2 |
| Diphenhydramine + ammonium chloride | 1 | 0.2 |
| Domperidone | 1 | 0.1 |
| Erythromycin | 1 | 0.2 |
| Esomeprazole | 1 | 0.1 |
| Estriol | 1 | 0.1 |
| Fiber tabs | 1 | 0.2 |
| Furosemide | 1 | 0.2 |
| Glibenclamide | 1 | 0.2 |
| Griseofulvin | 1 | 0.2 |
| GV | 1 | 0.1 |
| Insulin | 1 | 0.2 |
| Isosorbide | 1 | 0.1 |
| ketoconazole | 1 | 0.2 |
| ketoprofen | 1 | 0.2 |
| Levocabastine | 1 | 0.1 |
| Metholaton | 1 | 0.1 |
| Mometasone furoate | 1 | 0.1 |
| Olbas oil inhalant | 1 | 0.2 |
| Etofenamate | 1 | 0.2 |
| Silver sulphadiazine | 1 | 0.2 |
| Simvastatin | 1 | 0.3 |
| Sumatriptan | 1 | 0.2 |
| Tinidazole | 1 | 0.1 |
| Vitamin D | 1 | 0.1 |
| Warfarin | 1 | 0.1 |
| Dermovate | 1 | 0.2 |
| Movicol | 1 | 0.2 |
| Fybogel | 1 | 0.2 |
| Aloe vera | 1 | 0.2 |
| Total | 638 | 100.0 |
